# Supplementary material
Source: Royal Society of Chemistry journal article supplement (doi:10.1039/d6tc00083e)
Supplement: d6tc00083e1.pdf [file d6tc00083e1.pdf]

## Sequential Electrodeposition of Layered Co<sub>3</sub>O<sub>4</sub>/rGO/PANI Ternary nanocomposite Electrodes for High performance Supercapacitors

Radhika S. Desai<sup>a</sup>, Vinayak S. Jadhav<sup>b,e</sup>, Savita A Patil<sup>a</sup>, Pramod S. Pati<sup>d</sup>, Dhanaji S. Dalavi<sup>b\*</sup>

<sup>a</sup>Government college of engineering, Karad

<sup>b</sup>Department of Physics, Krishna Mahavidyalaya, Rethare Bk, Post-Shivnagar, Tal- Karad, Dist. Satara 415108,  
Maharashtra, India.

<sup>c</sup>Department of Physics, Shivaji University, Kolhapur, 416004, India.

<sup>d</sup>National Dong Hwa University, Hualien, Taiwan

<sup>e</sup>School of Nanoscience and Biotechnology, Shivaji University, Kolhapur, Maharashtra, 416004, India

\*E-mail: [dhanaphysics@gmail.com](mailto:dhanaphysics@gmail.com) (Dhanaji S. Dalavi)

| Samples<br>Scan rate<br>(mV s <sup>-1</sup> ) | Co <sub>3</sub> O <sub>4</sub>                                            |                                                                          | Co <sub>3</sub> O <sub>4</sub> /rGO                                       |                                                                             | Co <sub>3</sub> O <sub>4</sub> /rGO/PANI                                  |                                                                             |
|-----------------------------------------------|---------------------------------------------------------------------------|--------------------------------------------------------------------------|---------------------------------------------------------------------------|-----------------------------------------------------------------------------|---------------------------------------------------------------------------|-----------------------------------------------------------------------------|
|                                               | Anodic<br>peak<br>current<br><i>i</i> <sub>pa</sub> (mA/cm <sup>2</sup> ) | Cathodic peak<br>current <i>i</i> <sub>pc</sub><br>(mA/cm <sup>2</sup> ) | Anodic<br>peak<br>current<br><i>i</i> <sub>pa</sub> (mA/cm <sup>2</sup> ) | Cathodic<br>peak current<br><i>i</i> <sub>pc</sub><br>(mA/cm <sup>2</sup> ) | Anodic<br>peak<br>current<br><i>i</i> <sub>pa</sub> (mA/cm <sup>2</sup> ) | Cathodic<br>peak<br>current <i>i</i> <sub>pc</sub><br>(mA/cm <sup>2</sup> ) |
| 10                                            | 9.6478                                                                    | -7.5351                                                                  | 24.080                                                                    | -18.700                                                                     | 12.741                                                                    | -16.492                                                                     |
| 20                                            | 16.3281                                                                   | -12.8885                                                                 | 40.880                                                                    | -32.090                                                                     | 25.265                                                                    | -31.106                                                                     |
| 40                                            | 27.1808                                                                   | -21.5865                                                                 | 55.180                                                                    | -43.390                                                                     | 47.342                                                                    | -55.308                                                                     |
| 60                                            | 36.5024                                                                   | -28.9577                                                                 | 68.050                                                                    | -53.340                                                                     | 71.682                                                                    | -77.303                                                                     |
| 80                                            | 44.8136                                                                   | -35.2725                                                                 | 80.120                                                                    | -62.310                                                                     | 97.463                                                                    | -96.814                                                                     |
| 100                                           | 52.5287                                                                   | -40.9790                                                                 | 90.880                                                                    | -70.720                                                                     | 127.272                                                                   | -113.937                                                                    |

**Table S<sub>1</sub> Analysis of anodic and cathodic peak values of Co<sub>3</sub>O<sub>4</sub>, Co<sub>3</sub>O<sub>4</sub>/rGO and Co<sub>3</sub>O<sub>4</sub>/rGO/PANI samples**

| Electrolyte<br>Used to study<br>Co <sub>3</sub> O <sub>4</sub> /rGO/PAN<br>I | Scan<br>rate<br>(V s <sup>-1</sup> ) | Cs (F g <sup>-1</sup> )<br>From CV<br>analysis | Current<br>Density<br>(A g <sup>-1</sup> ) | Cs (F g <sup>-1</sup> )<br>From GCD<br>analysis | Specific<br>Capacity<br>(mAh g <sup>-1</sup> ) | Energy<br>density<br>(Wh kg <sup>-1</sup> ) | Power<br>density<br>(W kg <sup>-1</sup> ) |
|------------------------------------------------------------------------------|--------------------------------------|------------------------------------------------|--------------------------------------------|-------------------------------------------------|------------------------------------------------|---------------------------------------------|-------------------------------------------|
| 1 M H <sub>2</sub> SO <sub>4</sub>                                           | 0.1                                  | 1418.30                                        |                                            |                                                 |                                                |                                             |                                           |
|                                                                              | 0.08                                 | 1439.70                                        | 1.7                                        | 1970.30                                         | 383.11                                         | 134.09                                      | 599.21                                    |
|                                                                              | 0.06                                 | 1479.54                                        | 3.4                                        | 1951.60                                         | 379.48                                         | 132.82                                      | 1198.43                                   |
|                                                                              | 0.04                                 | 1529.54                                        | 5.1                                        | 1861.54                                         | 361.97                                         | 126.69                                      | 1797.64                                   |
|                                                                              | 0.02                                 | 1623.91                                        | 6.8                                        | 1846.65                                         | 359.07                                         | 125.68                                      | 2396.85                                   |
|                                                                              | 0.01                                 | 1650.35                                        | 8.6                                        | 1837.68                                         | 357.33                                         | 125.07                                      | 2996.06                                   |
| 0.5 M Na <sub>2</sub> SO <sub>4</sub>                                        | 0.1                                  | 1013.32                                        |                                            |                                                 |                                                |                                             |                                           |
|                                                                              | 0.08                                 | 1107.99                                        | 1.7                                        | 1409.81                                         | 313.30                                         | 125.32                                      | 684.81                                    |
|                                                                              | 0.06                                 | 1201.38                                        | 3.4                                        | 1258.37                                         | 279.62                                         | 111.86                                      | 1369.63                                   |
|                                                                              | 0.04                                 | 1309.93                                        | 5.1                                        | 1305.01                                         | 290.00                                         | 116.00                                      | 2054.44                                   |
|                                                                              | 0.02                                 | 1469.86                                        | 6.8                                        | 1234.49                                         | 274.33                                         | 109.73                                      | 2739.26                                   |
|                                                                              | 0.01                                 | 1526.58                                        | 8.6                                        | 870.92                                          | 193.54                                         | 77.41                                       | 3424.07                                   |

**Table S<sub>2</sub>** Comparison of specific capacitance, energy density, and power density for the ternary composite studied in acidic (1 M H<sub>2</sub>SO<sub>4</sub>) and neutral (0.5 M Na<sub>2</sub>SO<sub>4</sub>) aqueous media across various scan rates and current densities.

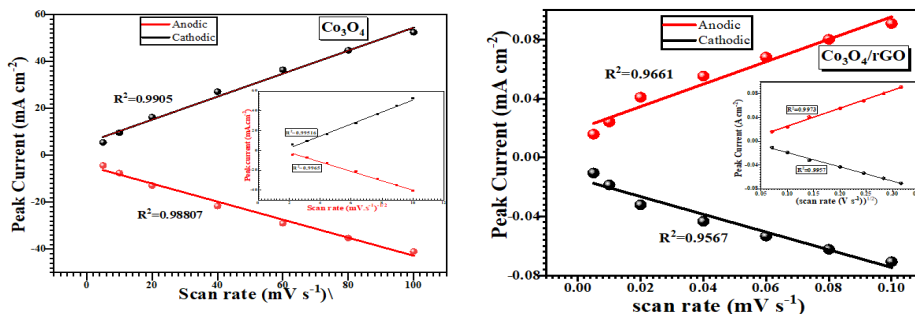

**Fig. S<sub>1</sub>** Plot of the anodic and cathodic peak current vs scan rate (inset: peak current vs square root of scan rate) for Co<sub>3</sub>O<sub>4</sub> sample and that for Co<sub>3</sub>O<sub>4</sub>/rGO as reported in our previous literature<sup>1</sup>

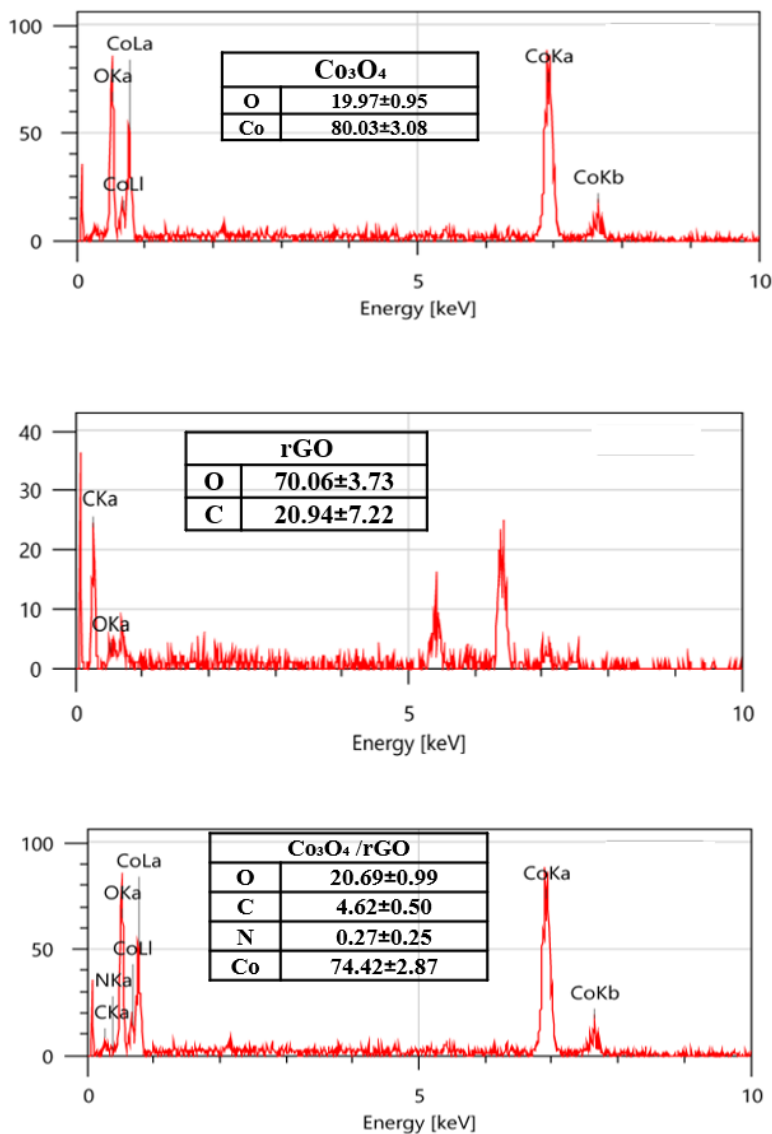

Fig. S<sub>2</sub> EDS analysis spectra of Co<sub>3</sub>O<sub>4</sub>, rGO and for Co<sub>3</sub>O<sub>4</sub>/rGO sample.

| Scan Rate (v) (mV/s) | Anodic Capacitive % | Anodic Diffusion % | Cathodic Capacitive % | Cathodic Diffusion % |
|----------------------|---------------------|--------------------|-----------------------|----------------------|
| 10                   | 100%                | 0%                 | 50.7%                 | 49.3%                |
| 20                   | 100%                | 0%                 | 59.3%                 | 40.7%                |
| 40                   | 100%                | 0%                 | 67.3%                 | 32.7%                |
| 60                   | 100%                | 0%                 | 71.7%                 | 28.3%                |
| 80                   | 100%                | 0%                 | 74.4%                 | 25.6%                |
| 100                  | 100%                | 0%                 | 76.5%                 | 23.5%                |

Table S<sub>3</sub> Based on the linear fit parameters ( $k_1$  and  $k_2$ ) as obtained from Fig. 10(c), the calculated capacitive and diffusion contributions for specific scan rates are given in table below:

| Sample                                             | Structure                                                | Mean $\pm$ Standard Deviation (nm) |
|----------------------------------------------------|----------------------------------------------------------|------------------------------------|
| Co <sub>3</sub> O <sub>4</sub>                     | Nanowires                                                | 56.5 $\pm$ 46.7                    |
| PANI                                               | Nanospheres                                              | 549.5 $\pm$ 395.8                  |
| rGO                                                | Nanosheets                                               | 984.1 $\pm$ 2836.6                 |
| Binary (rGO/Co <sub>3</sub> O <sub>4</sub> )       | nanowires/microcrystals anchored onto rGO sheet surfaces | 454.3 $\pm$ 328.0                  |
| Ternary (rGO/Co <sub>3</sub> O <sub>4</sub> /PANI) | large crumpled sheet-like features                       | 1662.1 $\pm$ 1581.6                |

Table. S<sub>4</sub> The average diameter of synthesized samples from SEM analysis.

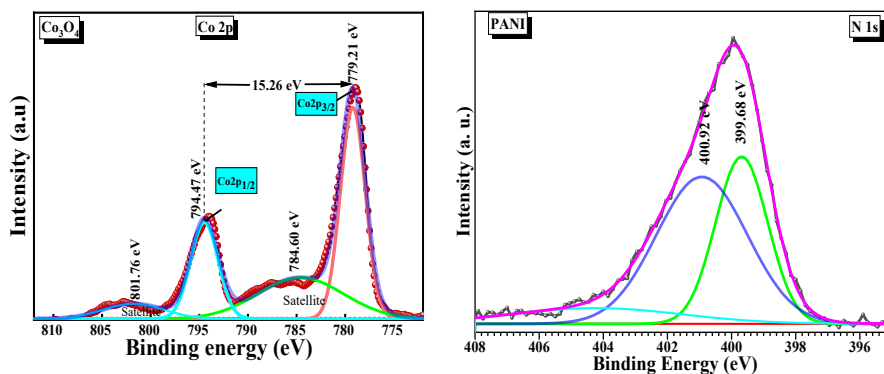

Fig. S<sub>3</sub> XPS spectra of pristine Co<sub>3</sub>O<sub>4</sub> (Co 2p)<sup>2</sup> and PANI (N 1s)<sup>3</sup>

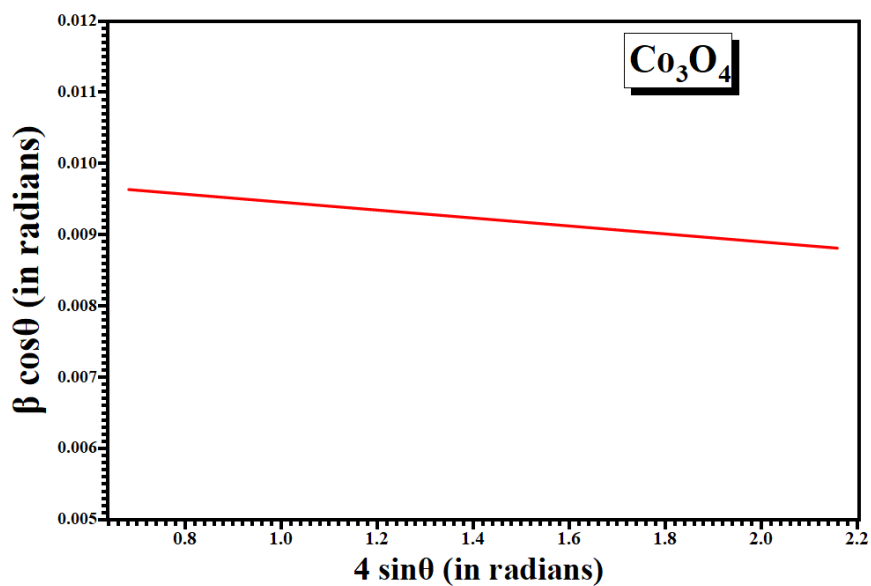

Fig. S<sub>4</sub> W-H plot ( $\beta \cos\theta$  vs  $4 \sin\theta$ ) for synthesized  $\text{Co}_3\text{O}_4$  electrode

| Specific Power<br>( $\text{W kg}^{-1}$ ) | Specific Energy<br>( $\text{Wh kg}^{-1}$ ) | Synthesized<br>electrode                         | Reference |
|------------------------------------------|--------------------------------------------|--------------------------------------------------|-----------|
| 800                                      | 33.5                                       | $\text{Co}_3\text{O}_4$ /polyaniline/graphene    | 17        |
| 895.02                                   | 106.95                                     | $\text{SrSnO}_3$ /rGO/PANI                       | 64        |
| 697.72                                   | 49.81                                      | PANI/ $\text{Co}_3\text{O}_4$ /Graphene          | 21        |
| 9560                                     | 27.98                                      | rGO/ $\text{Co}_3\text{O}_4$ /PANI               | 26        |
| 3.8                                      | 54.5                                       | Graphene/PANI/ $\text{Co}_3\text{O}_4$           | 22        |
| 359.19                                   | 47.24                                      | GO/PANI/ $\text{Co}_3\text{O}_4$                 | 23        |
| 114.2                                    | 126.8                                      | $\text{CuO}$ /PANI/rGO                           | 5         |
| 846.9                                    | 87.9                                       | $\text{Mn}_3\text{O}_4$ /NiMnO <sub>3</sub> /rGO | 65        |
| 250                                      | 13.4                                       | graphene/ $\text{Co}_3\text{O}_4$ /PPY           | 66        |
| 497                                      | 75.5                                       | PEDOT/GO/ $\text{Co}_3\text{O}_4$                | 67        |
| 2996                                     | 125.07                                     | $\text{Co}_3\text{O}_4$ /rGO/PANI                | This work |

Table S<sub>5</sub> Ragone plot showing the specific energy and specific power of synthesized ternary nanocomposite electrode and devices.
